# Supplementary material for: Can Disruption of Basal Ganglia-Thalamocortical Circuit in Wilson Disease Be Associated with Juvenile Myoclonic Epilepsy Phenotype?
Source: MDPI journal article supplement (doi:10.3390/brainsci12050553), 2022-04-26
Supplement: s1 [file s1]

**Supplementary Table S1:** Regions of increased and decreased functional connectivity of left M1  
Cluster-size threshold k= 87 voxels, corrected at  $\alpha < 0.05$ .

|                                                                                    | Side | Cluster | Voxel level | MNI coordinates |     |     | Talairach coordinates |     |     |
|------------------------------------------------------------------------------------|------|---------|-------------|-----------------|-----|-----|-----------------------|-----|-----|
| Brain areas                                                                        |      | k       | Z           | x               | y   | z   | x                     | y   | z   |
| <i>Decreased connectivity</i>                                                      |      |         |             |                 |     |     |                       |     |     |
| Parahippocampal gyrus (BA 37)                                                      | l    | 93      | 5.23        | -26             | -46 | -14 | -26                   | -45 | -10 |
|                                                                                    |      |         | 4.86        | -30             | -54 | -12 | -30                   | -53 | -7  |
|                                                                                    |      |         | 3.82        | -24             | -60 | -20 | -24                   | -59 | -14 |
| Cuneus and lingual gyrus (BA 17)                                                   | l    | 100     | 4.76        | -16             | -74 | 8   | -16                   | -71 | 11  |
|                                                                                    |      |         | 4.2         | -22             | -68 | 2   | -22                   | -66 | 5   |
|                                                                                    |      |         | 3.65        | -4              | -78 | 8   | -4                    | -75 | 11  |
| <i>Increased connectivity</i>                                                      |      |         |             |                 |     |     |                       |     |     |
| Post-central gyrus, inferior parietal lobule, supramarginal gyrus (BA 5 and BA 40) | r    | 241     | 7.06        | 32              | -42 | 54  | 32                    | -38 | 52  |
|                                                                                    |      |         | 6.15        | 30              | -44 | 68  | 30                    | -39 | 65  |
|                                                                                    |      |         | 4.73        | 24              | -44 | 58  | 24                    | -40 | 55  |
| Post-central gyrus, supramarginal gyrus (BA 2 and BA 40)                           | r    | 163     | 6.63        | 44              | -40 | 52  | 44                    | -36 | 50  |
|                                                                                    |      |         | 4.8         | 50              | -30 | 42  | 50                    | -27 | 40  |
| Post-central gyrus, inferior parietal lobule (BA 2 and BA 40)                      | l    | 396     | 6.07        | -42             | -38 | 52  | -42                   | -34 | 50  |
|                                                                                    |      |         | 5.64        | -46             | -26 | 32  | -46                   | -24 | 31  |
|                                                                                    |      |         | 4.98        | -38             | -36 | 40  | -38                   | -33 | 39  |
| Pre-central gyrus (BA 6)                                                           | l    | 89      | 5.76        | -24             | -18 | 56  | -24                   | -15 | 52  |

**Supplementary Table S2:** Regions of increased functional connectivity of right M1  
Cluster-size threshold k= 84 voxels, corrected at  $\alpha < 0.05$ .

|                                                            | Side | Cluster | Voxel level | MNI coordinates |     |    | Talairach coordinates |     |    |
|------------------------------------------------------------|------|---------|-------------|-----------------|-----|----|-----------------------|-----|----|
| Brain areas                                                |      | k       | Z           | x               | y   | z  | x                     | y   | z  |
| <i>Increased connectivity</i>                              |      |         |             |                 |     |    |                       |     |    |
| Supramarginal and post-central gyrus (BA 40)               | r    | 124     | 7.53        | 32              | -42 | 54 | 32                    | -38 | 52 |
|                                                            |      |         | 4.52        | 28              | -40 | 44 | 28                    | -37 | 42 |
| Post-central gyrus, inferior parietal lobule (BA and BA 2) | r    | 117     | 6.69        | 54              | -28 | 44 | 53                    | -25 | 42 |
|                                                            |      |         | 5.64        | 44              | -40 | 54 | 44                    | -36 | 52 |
| Post-central gyrus (BA 3)                                  | r    | 109     | 6.04        | 44              | -26 | 54 | 44                    | -23 | 51 |
|                                                            |      |         | 4.65        | 34              | -28 | 64 | 34                    | -24 | 60 |

**Supplementary Table S3:** Regions of increased and decreased functional connectivity of left GP  
Cluster-size threshold  $k=95$  voxels, corrected at  $\alpha < 0.05$ .

|                                                                  | Side | Cluster | Voxel level | MNI coordinates |     |     | Talairach coordinates |     |     |
|------------------------------------------------------------------|------|---------|-------------|-----------------|-----|-----|-----------------------|-----|-----|
| Brain areas                                                      |      | k       | Z           | x               | y   | z   | x                     | y   | z   |
| <i>Decreased connectivity</i>                                    |      |         |             |                 |     |     |                       |     |     |
| Cerebellum, brainstem                                            | l/r  | 302     | 7.19        | 14              | -32 | -22 | 14                    | -32 | -17 |
|                                                                  |      |         | 6.96        | -8              | -30 | -20 | -8                    | -30 | -15 |
|                                                                  |      |         | 6.32        | -14             | -26 | -16 | -14                   | -26 | -12 |
| Body of caudate nucleus                                          | l/r  | 431     | 6.43        | -2              | 4   | 16  | -2                    | 5   | 15  |
|                                                                  |      |         | 5.88        | -6              | 18  | 10  | -6                    | 18  | 8   |
|                                                                  |      |         | 5.36        | -10             | 8   | 20  | -10                   | 9   | 18  |
| <i>Increased connectivity</i>                                    |      |         |             |                 |     |     |                       |     |     |
| Thalamus (anterior nuclei), head of caudate nucleus              | r/l  | 420     | 7.72        | 8               | -8  | 14  | 8                     | -7  | 13  |
|                                                                  |      |         | 7.09        | -6              | 10  | 16  | -6                    | -9  | 15  |
|                                                                  |      |         | 6.93        | 6               | 4   | 0   | 6                     | 4   | 0   |
| Post-central gyrus (medial part), mid cingulate (BA 5 and BA 31) | l/r  | 199     | 6.28        | 4               | -36 | 54  | 4                     | -32 | 51  |
| Post and pre-central gyrus (BA 3 and BA 4)                       | l    | 110     | 5.37        | -42             | -22 | 42  | -42                   | -19 | 40  |
|                                                                  |      |         | 4.32        | -36             | -18 | 52  | -36                   | -15 | 49  |
| Post and pre-central gyrus (BA 3, BA 4 and BA 6)                 | r    | 279     | 4.97        | 8               | -36 | 68  | 8                     | -32 | 64  |
|                                                                  |      |         | 4.54        | 14              | -32 | 64  | 14                    | -28 | 60  |
|                                                                  |      |         | 4.51        | 28              | -30 | 60  | 28                    | -26 | 57  |
| Post and pre-central gyrus (BA 3 and BA 4)                       | l    | 260     | 4.82        | -8              | -40 | 68  | -8                    | -36 | 64  |
|                                                                  |      |         | 4.76        | -24             | -30 | 52  | -24                   | -27 | 49  |
|                                                                  |      |         | 4.68        | -38             | -28 | 56  | -38                   | -25 | 53  |

**Supplementary Table S4:** Regions of increased and decreased functional connectivity of right GP  
Cluster-size threshold k= 108 voxels, corrected at  $\alpha < 0.05$ .

|                                                                                                       | Side | Cluster | Voxel level | MNI coordinates |     |     | Talairach coordinates |     |     |
|-------------------------------------------------------------------------------------------------------|------|---------|-------------|-----------------|-----|-----|-----------------------|-----|-----|
| Brain areas                                                                                           |      | k       | Z           | x               | y   | z   | x                     | y   | z   |
| <i>Decreased connectivity</i>                                                                         |      |         |             |                 |     |     |                       |     |     |
| Cerebellum, brainstem                                                                                 | l/r  | 447     | >8          | 12              | -30 | -17 | 12                    | -30 | -17 |
|                                                                                                       |      |         | >8          | 10              | -40 | -18 | 10                    | -40 | -13 |
|                                                                                                       |      |         | >8          | -8              | -30 | -20 | -8                    | -30 | -15 |
| Body of the caudate nucleus                                                                           | l/r  | 482     | >8          | -4              | -2  | 18  | -4                    | -1  | 17  |
|                                                                                                       |      |         | 7.49        | 8               | -2  | 20  | 8                     | -1  | 18  |
|                                                                                                       |      |         | 6.11        | -6              | 18  | 10  | -6                    | 18  | 8   |
| Cuneus, lingual gyrus, parahippocampal gyrus, posterior Cingulate (BA 17, BA 18, BA 28, BA 23, BA 30) | l/r  | 1002    | 7.28        | 24              | -68 | 2   | 24                    | -66 | 5   |
|                                                                                                       |      |         | 6.56        | -8              | -80 | 10  | -8                    | -77 | 13  |
|                                                                                                       |      |         | 6.05        | 26              | -52 | 0   | 26                    | -50 | 3   |
| Precuneus, middle occipital gyrus (BA 7 and BA 19)                                                    | r    | 220     | 6.08        | 30              | -72 | 38  | 30                    | -68 | 38  |
|                                                                                                       |      |         | 5.53        | 30              | -84 | 24  | 30                    | -80 | 26  |
|                                                                                                       |      |         | 4.45        | 32              | -76 | 24  | 32                    | -73 | 26  |
| Precuneus, middle occipital gyrus (BA 7 and BA 19)                                                    | l    | 236     | 5.89        | -30             | -72 | 42  | -30                   | -68 | 42  |
|                                                                                                       |      |         | 5.69        | -26             | -76 | 34  | -26                   | -72 | 35  |
|                                                                                                       |      |         | 5.14        | -28             | -86 | 18  | -28                   | -82 | 21  |
| Cerebellum, fusiform gyrus (BA 37)                                                                    | r    | 114     | 4.67        | 28              | -58 | -22 | 28                    | -57 | -16 |
|                                                                                                       |      |         | 4.34        | 28              | -52 | -16 | 28                    | -51 | 11  |
|                                                                                                       |      |         | 4.16        | 32              | -36 | -20 | 32                    | -36 | -15 |
| <i>Increased connectivity</i>                                                                         |      |         |             |                 |     |     |                       |     |     |
| Head and bod of caudate nucleus, Thalamus (anterior nuclei)                                           | l/r  | 682     | >8          | 6               | 4   | 0   | 6                     | 4   | 0   |
|                                                                                                       |      |         | >8          | 6               | -8  | 14  | 6                     | -7  | 13  |
|                                                                                                       |      |         | >8          | -4              | 0   | 8   | -4                    | 0   | 7   |
| Thalamus (pulvinar)                                                                                   | l/r  | 111     | 6.88        | -18             | -30 | 14  | 18                    | -28 | 14  |
|                                                                                                       |      |         | 5.78        | 6               | -30 | 6   | 6                     | -29 | 7   |
|                                                                                                       |      |         | 4.77        |                 |     |     |                       |     |     |
| Pre and post-central gyrus (BA 3 and BA 4)                                                            | l    | 318     | 6.08        | -24             | -30 | 52  | -24                   | -27 | 49  |
|                                                                                                       |      |         | 4.76        | -20             | -40 | 56  | -20                   | -36 | 53  |
|                                                                                                       |      |         | 4.56        | -10             | -34 | 68  | -10                   | -30 | 64  |
| Pre and post-central gyrus (BA 3 and BA 4)                                                            | r    | 364     | 5.81        | 42              | -24 | 50  | 42                    | -21 | 47  |
|                                                                                                       |      |         | 5.3         | 14              | -34 | 62  | 14                    | -30 | 59  |
|                                                                                                       |      |         | 5.15        | 28              | -32 | 62  | 28                    | -28 | 59  |
| Post-central gyrus (BA 3 and BA 2)                                                                    | l    | 109     | 5.26        | -42             | -22 | 42  | -42                   | -19 | 40  |
|                                                                                                       |      |         | 5.07        | -36             | -24 | 36  | -36                   | -22 | 34  |
|                                                                                                       |      |         | 4.27        | -48             | -18 | 46  | -48                   | -15 | 43  |
