# Supplementary material for: Can Disruption of Basal Ganglia-Thalamocortical Circuit in Wilson Disease Be Associated with Juvenile Myoclonic Epilepsy Phenotype?
Source: Brain Sci. 2022 Apr 26;12(5):553. doi: 10.3390/brainsci12050553 (PMC9138607; doi:10.3390/brainsci12050553)
Supplement: Supplementary file 1 [file brainsci-12-00553-s001.zip]

Archive with 4 entries (4 files):
- Supplementary Figure S1.jpeg
- Supplementary Figure S2.jpeg
- Supplementary Tables.pdf
- Supplementary text.pdf
